# Supplementary material for: Antibacterial activity of apramycin at acidic pH warrants wide therapeutic window in the treatment of complicated urinary tract infections and acute pyelonephritis
Source: PubMed Central journal article supplement (PMC8577399; doi:10.1016/j.ebiom.2021.103652), 2021-11-02
Supplement: mmc2.pdf [file mmc2.pdf]

## **Antibacterial activity of apramycin at acidic pH warrants wide therapeutic window in the treatment of complicated urinary tract infections and acute pyelonephritis**

Katja Becker<sup>a</sup>, Sha Cao<sup>b</sup>, Anna Nilsson<sup>c,d</sup>, Maria Erlandsson<sup>e</sup>, Sven-Kevin Hotop<sup>f</sup>, Janis Kuka<sup>g</sup>, Jon Hansen<sup>h</sup>, Klara Haldimann<sup>a</sup>, Solveiga Grinberga<sup>g</sup>, Talia Berruga-Fernández<sup>b</sup>, Douglas L. Huseby<sup>b</sup>, Reza Shariatgorji<sup>c,d</sup>, Evelina Lindmark<sup>e</sup>, Björn Platzack<sup>e</sup>, Erik C. Böttger<sup>a</sup>, David Crich<sup>i</sup>, Lena E. Friberg<sup>j</sup>, Carina Vingsbo Lundberg<sup>h</sup>, Diarmaid Hughes<sup>b</sup>, Mark Brönstrup<sup>f</sup>, Per E. Andrén<sup>c,d</sup>, Edgars Liepinsh<sup>g</sup>, Sven N. Hobbie<sup>a,\*</sup>

<sup>a</sup> University of Zurich, Institute of Medical Microbiology, Zurich, Switzerland

<sup>b</sup> Uppsala University, Department of Medical Biochemistry and Microbiology, Uppsala, Sweden

<sup>c</sup> Uppsala University, Department of Pharmaceutical Biosciences, Uppsala, Sweden

<sup>d</sup> Uppsala University, Science for Life Laboratory, Uppsala, Sweden

<sup>e</sup> RISE Research Institutes of Sweden, Södertälje, Sweden

<sup>f</sup> Helmholtz Centre for Infection Research, Braunschweig, Germany

<sup>g</sup> Latvian Institute of Organic Synthesis, Riga, Latvia

<sup>h</sup> Statens Serum Institute, Copenhagen, Denmark

<sup>i</sup> University of Georgia, Department of Pharmaceutical and Biomedical Sciences, Athens, GA, USA

<sup>j</sup> Uppsala University, Department of Pharmacy, Uppsala, Sweden

## Supplementary Methods

### Antimicrobial susceptibility testing in urine

The MIC of apramycin in urine was determined by the same standard procedures described in the Methods section, with the exception of substituting cation-adjusted Mueller-Hinton broth with pH-adjusted urine. Morning urine was collected from healthy donors and pooled. Pooled urine was centrifuged and the pH of the supernatant was adjusted to either pH5.0 with 0.1N HCl or to pH7.4 with 0.2 N NaOH, followed by filter sterilization. Results are presented in Table S5.

### Supplementary animal efficacy studies

The mouse UTI studies with the MDR pan-aminoglycoside resistant *E. coli* isolate EN0591 (*rmtB*) and *E. coli* isolate EN0355 with limited apramycin susceptibility (MIC of 8 mg/L) were conducted at the Statens Serum Institute in Denmark. Studies were approved by the National Committee of Animal Ethics, Ministry of Environment and food of Denmark. Female C3H/HeJ mice were infected with 50  $\mu$ L of  $10^9$  CFU/ml *E. coli* EN591 or *E. coli* EN0355 suspension by intraurethral catheter after treatment with Nurofen Junior (NSAID, 30 mg/kg) for pain alleviation approximately 1 h prior to inoculation. Mice had *ad libido* access to 5% glucose drinking water to induce diuresis from 3 days prior to inoculation onwards. Twice daily, subcutaneous treatment with apramycin (lot.nr: 150710301, Exp. 07.2018) at doses of 0.03-30 mg/kg and vehicle control was started one day post-infection and continued for three consecutive days. At day 1 (baseline) and day 4 post-infection after urine sampling mice were sacrificed by cervical dislocation and bladder and kidneys were removed aseptically for bacterial enumeration. CFU counts were transformed to  $\log_{10}$  and plotted against the  $\log_{10}$  of administered doses (Fig. S2).

The UTI study with diabetic mice was subcontracted to the University of Texas Medical Branch, studies were approved by the Institutional Animal Care and Use Committee of the University of Texas Medical Branch. Animals were obtained from Charles River laboratories and housed in the animal facilities under standard conditions. *E. coli* ST131 H30Rx strain MVA072 (M072) was recovered from a chronic cystitis patient. The bacteria were cultured on LB or 5% blood agar at 35-37°C overnight. *E. coli* M072 was passaged to enhance fimbriae and pili formation by static subculture for 15 h at 37°C prior to inoculum preparation. A cohort of one-hundred female C3H/HeN mice at 4-5 weeks of age was used for the study. After acclimation, animals were randomly assigned to one of two groups, a non-diabetic group and a streptozotocin-induced diabetic group. Animals in the diabetic group were subjected to streptozotocin (STZ) diabetic induction (4 daily doses of 65 mg/kg after a 4 h fast). Blood was collected from a nick in the tail and tested with an animal glucometer over the next 14 days to ensure that random blood sugar levels (RBS) increased to diabetic levels (>250). Mice in both groups were infected with  $10^7$  CFU *E. coli* M072 in 50  $\mu$ L by the transurethral route on day 0 and twice daily subcutaneous treatment with apramycin (0.1-10 mg/kg) and vehicle control was started 2 days (48 h) post-infection ( $n = 10$ / dosing group). Urine was collected daily and animals were sacrificed on day 5 post-infection. The bacterial burden in urine was determined by qPCR after DNA extraction (10 genomes/CFU) and bladder and kidneys were harvested for bacterial enumeration by qPCR as well (Fig. S3).

## Supplementary Results

### In vitro susceptibility

**Table S1** Species distribution in European cUTI cohorts and in the NDARO uropathogenic panel.

|                             | The Netherlands (1)      |                            | Poland (2)               |                                                                                  | Switzerland (3)          |                            | The Netherlands (4)      |                            | NDARO (Gram-neg.)        |
|-----------------------------|--------------------------|----------------------------|--------------------------|----------------------------------------------------------------------------------|--------------------------|----------------------------|--------------------------|----------------------------|--------------------------|
| Total cUTI isolates (n)     | 462                      |                            | 237                      |                                                                                  | 129                      |                            | 27 922                   |                            | 12 956                   |
| Isolates                    | Species distribution (%) | Gentamicin susceptible (%) | Species distribution (%) | Amino-glycoside susceptibility                                                   | Species distribution (%) | Gentamicin susceptible (%) | Species distribution (%) | Gentamicin susceptible (%) | Species distribution (n) |
| <i>E. coli</i>              | 51,3                     | 93,7                       | 65,8                     | Enterobacteriaceae:<br>86% gentamicin susceptible;<br>93.9% amikacin susceptible | 56,2                     | nd                         | 47,2                     | 94,00                      | 5 049 (39.0%)            |
| <i>K. pneumoniae</i>        | 9,5                      | 90,9                       | 12,6                     |                                                                                  | 4,6                      | nd                         | 6,7                      | 95,3                       | 5 456 (42.1%)            |
| <i>P. mirabilis</i>         | 6,7                      | 87,1                       | 8,4                      |                                                                                  | 2,3                      | nd                         | 7,6                      | 91,8                       | nd                       |
| Citrobacter spp.            | nd                       | nd                         | 0,4                      |                                                                                  | 3,1                      | nd                         | nd                       | nd                         | 141 (1.1%)               |
| <i>Enterobacter spp.</i>    | nd                       | nd                         | 0,4                      |                                                                                  | 0,77                     | nd                         | 2,1                      | 92,1                       | 488 (3.8%)               |
| <i>P. aeruginosa</i>        | 5,6                      | 92,3                       | nd                       | nd                                                                               | 0,77                     | nd                         | 5                        | 95                         | 672 (5.2%)               |
| Enterococcus spp.           | 9,7                      | nd                         | nd                       | nd                                                                               | 9,3                      | nd                         | 15,1                     | low level resistance       | nd                       |
| <i>S. aureus</i>            | nd                       | nd                         | nd                       | nd                                                                               | 2,32                     | nd                         | 2,7                      | 98,7                       | nd                       |
| <i>Streptococci group B</i> | 2,6                      | nd                         | nd                       | nd                                                                               | 6,2                      | nd                         | 2,9                      | nd                         | nd                       |

- (1) Wijting IEA, Alsmas J, Melles DC, Schipper EM, Schuit SCE. Urinary tract infections in a university hospital: pathogens and antibiotic susceptibility. *Neth J Med* 2019; 77(6): 210-9.
- (2) Stefaniuk E, Suchocka U, Bosacka K, Hryniewicz W. Etiology and antibiotic susceptibility of bacterial pathogens responsible for community-acquired urinary tract infections in Poland. *Eur J Clin Microbiol Infect Dis* 2016; 35(8): 1363-9.
- (3) Plate A, Kronenberg A, Risch M, et al. Active surveillance of antibiotic resistance patterns in urinary tract infections in primary care in Switzerland. *Infection* 2019; 47(6): 1027-35.
- (4) Koningstein M, van der Bij AK, de Kraker ME, et al. Recommendations for the empirical treatment of complicated urinary tract infections using surveillance data on antimicrobial resistance in the Netherlands. *PLoS One* 2014; 9(1): e86634.

**Table S2** List of resistance genes applied in determining the genotypic susceptibility of isolates deposited in the NDARO\*

|                                         | <b>Apramycin</b>                   | <b>Amikacin</b>    | <b>Gentamicin</b> | <b>Tobramycin</b>  |
|-----------------------------------------|------------------------------------|--------------------|-------------------|--------------------|
| <b>Aminoglycoside-modifying enzymes</b> | <i>aac(1)-Ia</i>                   | <i>aac(6')-I</i>   | <i>aac(6')</i>    | <i>aac(6')</i>     |
|                                         | <i>aac(3)-IV</i>                   | <i>aph(3')-III</i> | <i>aac(3)-I</i>   | <i>aac(3)-II</i>   |
|                                         | <i>apmA</i>                        | <i>aph(3')-VI</i>  | <i>aac(3)-II</i>  | <i>aac(3)-III</i>  |
|                                         |                                    | <i>ant(4')</i>     | <i>aac(3)-III</i> | <i>aac(3)-IV</i>   |
|                                         |                                    |                    | <i>aac(3)-VII</i> | <i>aac(2')</i>     |
|                                         |                                    |                    | <i>aph(2'')</i>   | <i>aph(2'')-Ia</i> |
|                                         |                                    |                    | <i>ant(2'')</i>   | <i>aph(2'')-Id</i> |
|                                         |                                    |                    | <i>aac(3)-IV</i>  | <i>aph(2'')-Ib</i> |
|                                         |                                    |                    | <i>apmA</i>       | <i>aph(2'')-II</i> |
|                                         |                                    |                    |                   | <i>ant(2'')</i>    |
|                                         |                                    |                    |                   | <i>ant(4')</i>     |
|                                         |                                    |                    |                   | <i>apmA</i>        |
|                                         | <b>Ribosome methyltransferases</b> | <i>npmA</i>        | <i>npmA</i>       | <i>npmA</i>        |
|                                         |                                    | <i>armA</i>        | <i>armA</i>       | <i>armA</i>        |
|                                         |                                    | <i>rmtA</i>        | <i>rmtA</i>       | <i>rmtA</i>        |
|                                         |                                    | <i>rmtB</i>        | <i>rmtB</i>       | <i>rmtB</i>        |
|                                         |                                    | <i>rmtC</i>        | <i>rmtC</i>       | <i>rmtC</i>        |
|                                         |                                    | <i>rmtD</i>        | <i>rmtD</i>       | <i>rmtD</i>        |
|                                         |                                    | <i>rmtF</i>        | <i>rmtF</i>       | <i>rmtF</i>        |
|                                         |                                    | <i>rmtG</i>        | <i>rmtG</i>       | <i>rmtG</i>        |
|                                         |                                    | <i>rmtH</i>        | <i>rmtH</i>       | <i>rmtH</i>        |
| <i>kamB</i>                             |                                    | <i>kamB</i>        | <i>kamB</i>       | <i>kamB</i>        |

\*The minimal determinant of each resistance genotype was identified, meaning that a search for *aac(6')* will detect all subtypes of this gene. A search for *aac(3)-I* implies searching for *aac(3)-Ia, b, c* etc.

**Table S3** Bacterial and rodent strains used in this study

| Species                       | Strain                               | Feature                              | Source                             |
|-------------------------------|--------------------------------------|--------------------------------------|------------------------------------|
| Bacteria                      |                                      |                                      |                                    |
| <i>Escherichia coli</i>       | FDA strain Seattle 1946              | Reference strain                     | ATCC 25922                         |
| <i>Escherichia coli</i>       | J96                                  | UTI model strain                     | ATCC 700336                        |
| <i>Escherichia coli</i>       | EN0591                               | MDR, <i>rmtB</i>                     | University of Zurich               |
| <i>Escherichia coli</i>       | EN0335                               | MIC = MIC <sub>90</sub> = 8          | Uppsala University                 |
| <i>Escherichia coli</i>       | ST131 H30Rx strain MVA072 (M072)     | MDR, ESBL                            | University of Texas Medical Branch |
| <i>Enterobacter cloacae</i>   | Various clinical isolates (Table S4) | Uropathogenic, drug resistant        | University of Zurich               |
| <i>Klebsiella</i> spp.        | Various clinical isolates (Table S4) | Uropathogenic, drug resistant        | University of Zurich               |
| <i>Proteus mirabilis</i>      | Various clinical isolates (Table S4) | Uropathogenic, drug resistant        | University of Zurich               |
| <i>Pseudomonas aeruginosa</i> | Various clinical isolates (Table S4) | Uropathogenic, drug resistant        | University of Zurich               |
| <i>Staphylococcus aureus</i>  | Various clinical isolates (Table S4) | Uropathogenic, drug resistant        | University of Zurich               |
| Rodents                       |                                      |                                      |                                    |
| <i>Mus musculus</i>           | C3H-HeJ                              | UTI model                            | Jackson Laboratory                 |
| <i>Mus musculus</i>           | C3H/HeN                              | Diabetic induction by streptozotocin | Charles River Laboratories         |
| <i>Mus musculus</i>           | CD-1                                 | Multipurpose                         | Envigo                             |
| <i>Mus musculus</i>           | NMRI                                 | Multipurpose                         | Envigo                             |
| <i>Rattus norvegicus</i>      | Sprague-Dawley                       | Multipurpose                         | Envigo                             |
| <i>Rattus norvegicus</i>      | Wistar                               | Multipurpose                         | Envigo                             |

**Table S4:** Minimal inhibitory concentrations determined by broth microdilution antimicrobial susceptibility assays.

| SPECIES              | STRAIN      | GENOTYPE          | APR   | AMI   | TOB      | GEN      | MER       | PIP-TAZ | CTA   |
|----------------------|-------------|-------------------|-------|-------|----------|----------|-----------|---------|-------|
| <i>E. coli</i>       | ATCC 25922  | WT                | 4     | 2     | 0.5-1    | 0.5-1    | 0.03      | 2       | 0.13  |
| <i>E. coli</i>       | ATCC 700336 | nd                | 4     | 2     | 0.5-1    | 0.5-1    | 0.03      | 2       | ≤0.06 |
| <i>E. coli</i>       | EN0591      | RmtB              | 4     | >256  | >256     | >256     | 0.06      | 16      | >64   |
| <i>E. coli</i>       | EN0335      | nd                | 8     | 4     | 1-2      | 1-2      | 0.016     | 2       | 0.06  |
| <i>E. coli</i>       | 252 720     | ESBL              | 8     | 8     | 32       | 128      | 0.03      | 32      | >64   |
| <i>E. coli</i>       | 254 525     | nd                | 2     | 4     | 16       | 32       | ≤0.016    | 64      | 1-2   |
| <i>E. coli</i>       | 257 782     | ESBL              | 4     | 4     | 32       | 64       | 0.03      | 8       | >64   |
| <i>E. coli</i>       | 260 097     | AmpC              | 2-4   | 1     | 0.5      | 0.25-0.5 | 0.06      | 128     | >64   |
| <i>E. coli</i>       | 261 917     | ESBL, OXA-48      | 2-4   | 1     | 0.5      | 0.25-0.5 | 0.06      | >128    | >64   |
| <i>E. coli</i>       | 250 697     | ESBL, AmpC        | 4     | 2     | 16       | 8        | 0.03      | 8       | >64   |
| <i>E. coli</i>       | 257 384     | ESBL              | 4     | 4     | 32       | 64       | ≤0.016    | 16      | >64   |
| <i>E. coli</i>       | 260 930     | nd                | 8     | 32    | 64       | 128      | ≤0.016    | 8       | 0.5   |
| <i>E. coli</i>       | 263 311     | AmpC              | 4     | 4     | ≤0.25    | ≤0.25    | 0.125     | 128     | 4-8   |
| <i>E. coli</i>       | 265 199     | ESBL, OXA-48      | 4     | 1-2   | 4        | 64       | 0.5       | 128     | >64   |
| <i>E. coli</i>       | 269 430     | ESBL              | 2-4   | 4-8   | 8        | 0.5      | 0.03      | 8       | >64   |
| <i>E. coli</i>       | 259 296     | ESBL, NDM-1, RmtB | 4     | 128   | 256      | >256     | 4         | >128    | >64   |
| <i>E. coli</i>       | 263 943     | ESBL              | 4     | 4     | 8        | 16       | ≤0.016    | 4       | >64   |
| <i>E. coli</i>       | 264 675     | nd                | 2     | 1     | 32       | 8        | ≤0.016    | 64      | 0.5-1 |
| <i>E. coli</i>       | 268 263     | ESBL              | 16    | 32    | 64       | 256      | 0.06      | 16      | >64   |
| <i>E. coli</i>       | 250 958     | ESBL              | 4     | 4     | 32       | 16       | 0.06      | 16      | >64   |
| <i>E. coli</i>       | 252 115     | ESBL              | 4     | 4     | 8        | 32       | 0.03      | 16      | >64   |
| <i>E. coli</i>       | 252 467     | ESBL, VIM         | 2-4   | 8     | 16       | 8        | 0.25-0.5  | 128     | >64   |
| <i>E. coli</i>       | 259 714     | ESBL              | 8-16  | 4     | 1        | 1        | 0.125     | >128    | >64   |
| <i>E. coli</i>       | 260 063     | ESBL              | 2     | 1     | 0.5      | 0.5      | 0.06      | 2       | >64   |
| <i>E. cloacae</i>    | 250 027     | cAmpC, ESBL, VIM  | 1-2   | 0.5-1 | 8        | 8        | >16       | >128    | >64   |
| <i>E. cloacae</i>    | 259 086     | cAmpC, ESBL, VIM  | 1-2   | 8     | 32       | 16       | 4         | >128    | >64   |
| <i>E. cloacae</i>    | 255 527     | cAmpC, OXA-48     | 1-2   | 8     | 16       | 16       | 1         | >128    | >64   |
| <i>E. cloacae</i>    | 260 779     | cAmpC             | 1-2   | 8     | 16       | 32       | 0.06      | 128     | >64   |
| <i>E. cloacae</i>    | 264 713     | cAmpC, ESBL       | 1     | 1     | 2        | 8        | 0.03      | 2       | >64   |
| <i>K. oxytoca</i>    | 266 250     | ESBL, AmpC        | 2-4   | 8     | 64       | 256      | 0.03      | >128    | 32    |
| <i>K. oxytoca</i>    | 258 351     | ESBL              | 2-4   | 8     | 16       | 64       | 0.03      | 32      | >64   |
| <i>K. oxytoca</i>    | 260 643     | ESBL              | 2-4   | 4     | 8        | 64       | 0.06      | 32      | >64   |
| <i>K. oxytoca</i>    | 268 204     | ESBL              | 2     | 1     | 0.5      | 0.25-0.5 | 0.06      | >128    | 8     |
| <i>K. oxytoca</i>    | 274 763     | nd                | 2     | 1     | ≤0.25    | 0.5      | 0.06      | >128    | 8     |
| <i>K. pneumoniae</i> | 255 915     | ESBL              | 2     | 1     | 0.5      | 0.5      | 8         | >128    | >64   |
| <i>K. pneumoniae</i> | 263 106     | ESBL              | 2     | 2     | 16       | 32       | 0.03      | 128     | >64   |
| <i>K. pneumoniae</i> | 252 084     | ESBL              | 1     | 0.5   | ≤0.25    | ≤0.25    | 0.06      | 8       | 64    |
| <i>K. pneumoniae</i> | 252 695     | AmpC              | 2     | 2     | 0.5      | 0.5      | 0.06      | 128     | 64    |
| <i>K. pneumoniae</i> | 268 507     | ESBL              | 2     | 1-2   | 4        | 32       | 0.03      | 4       | >64   |
| <i>K. pneumoniae</i> | 272 212     | ESBL              | 2     | 0.5   | 2        | 32       | 0.03      | 1       | >64   |
| <i>K. pneumoniae</i> | 256 216     | ESBL, OXA-48      | 1-2   | 4     | 64       | 64       | >16       | >128    | >64   |
| <i>K. pneumoniae</i> | 251 672     | ESBL, RmtB        | 2-4   | >256  | >256     | >256     | 0.125     | >128    | >64   |
| <i>K. pneumoniae</i> | 263 115     | ESBL              | 1-2   | 0.5-1 | 0.25-0.5 | ≤0.25    | 0.25      | 128     | >64   |
| <i>K. pneumoniae</i> | 256 706     | nd                | 2     | 1     | ≤0.25    | ≤0.25    | 0.06      | 4       | 0     |
| <i>P. mirabilis</i>  | 264 373     | ESBL              | 2     | 1     | 0.5      | 0.5      | 0.03-0.06 | 0.5     | 32    |
| <i>P. mirabilis</i>  | 253 814     | AmpC              | 4-8   | 2-4   | 0.5      | 1        | 0.06-0.13 | 0.5     | 4     |
| <i>P. mirabilis</i>  | 263 150     | NDM-1, RmtB       | 4     | >256  | >256     | >256     | 1         | 16      | 64    |
| <i>P. mirabilis</i>  | 255 417     | ESBL              | 256   | 32    | 8        | 8        | 0.06      | 0.25    | >64   |
| <i>P. mirabilis</i>  | 270 786     | VIM               | 4     | 4     | 4        | 2        | 1         | 128     | 64    |
| <i>P. mirabilis</i>  | 254 365     | ESBL              | 8     | 8     | 1        | 1        | 0.125     | 0.5     | >64   |
| <i>P. mirabilis</i>  | 266 037     | AmpC              | 8     | 8     | 64       | 128      | 0.125     | 64      | >64   |
| <i>P. mirabilis</i>  | 267 794     | nd                | 128   | 8     | 32       | 8        | 0.06      | 16      | 0.5   |
| <i>P. aeruginosa</i> | 250 062     | MDR               | 8     | 32    | 32       | 32       | 16        | 16      | 64    |
| <i>P. aeruginosa</i> | 265 995     | MDR               | 4-8   | 2     | 0.5      | 2        | 16        | 128     | >64   |
| <i>P. aeruginosa</i> | 257 264     | MDR               | 16    | 32    | 64       | 16       | 16        | 8-16    | 64    |
| <i>P. aeruginosa</i> | 257 277     | MDR               | 16-32 | 16    | 1        | 4        | 2-4       | 32      | >64   |
| <i>P. aeruginosa</i> | 257 530     | MDR               | 8     | 4     | 0.5      | 2        | 16        | 32      | >64   |
| <i>P. aeruginosa</i> | 257 892     | MDR               | 16    | 8     | 2        | 8        | 2-4       | 2-4     | 8-16  |
| <i>P. aeruginosa</i> | 269 616     | MDR               | 8     | 64    | 64       | 4        | >16       | 32      | >64   |
| <i>P. aeruginosa</i> | 256 257     | MDR               | 16    | 32    | 256      | >256     | 16        | 128     | >64   |
| <i>P. aeruginosa</i> | 261 728     | MDR               | 2     | 2     | 16       | 16       | 16        | 128     | >64   |

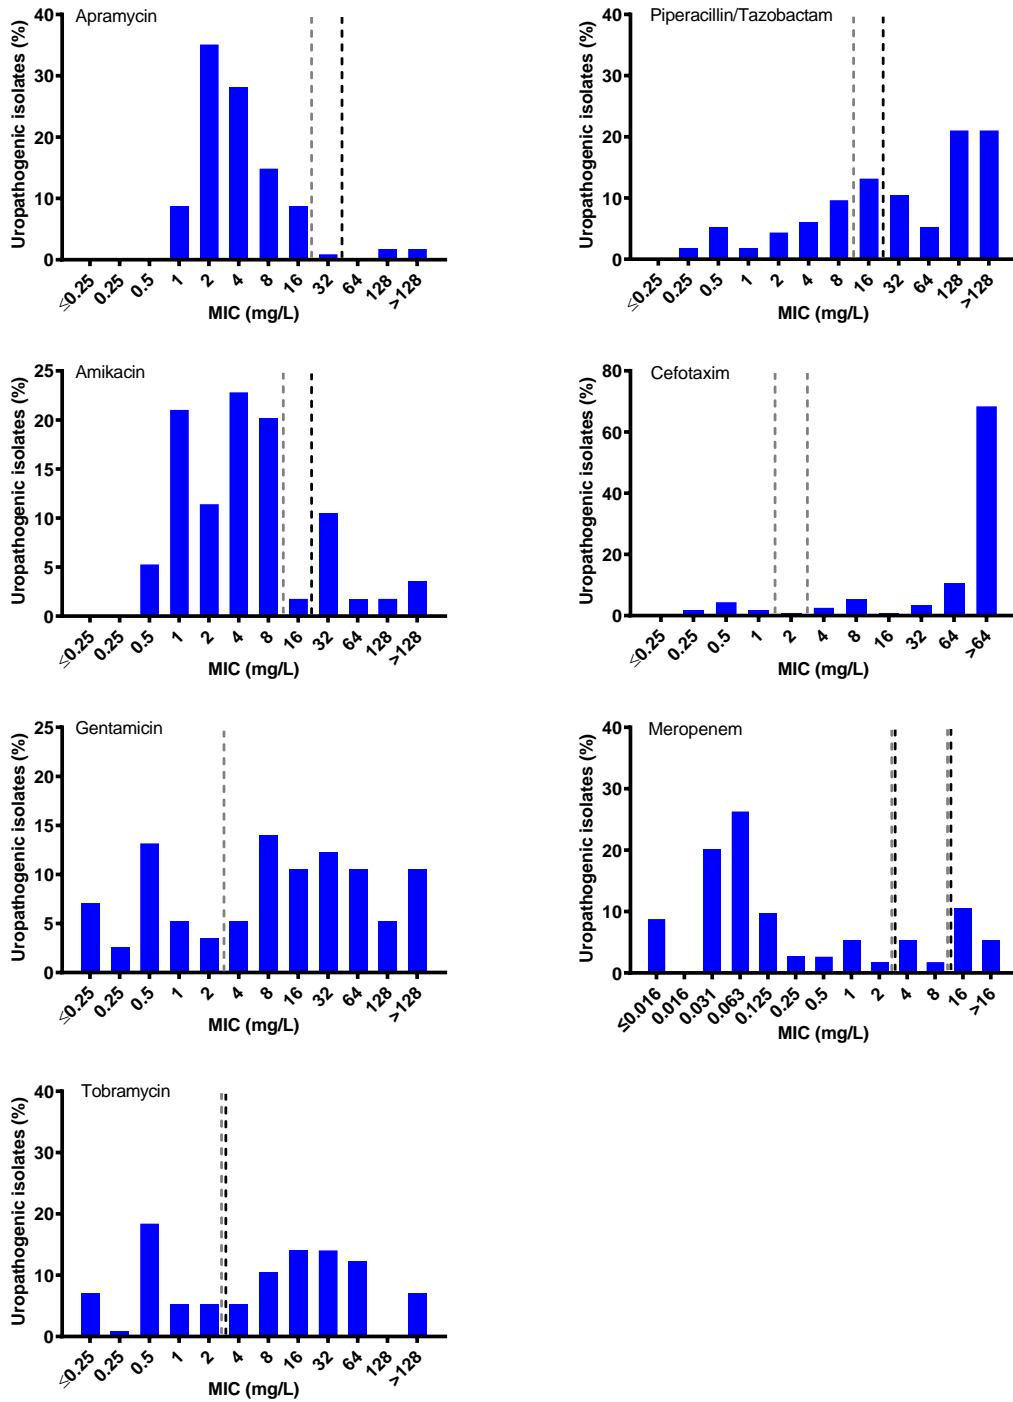

**Fig. S1 MIC distribution of apramycin in comparison to other drugs for a panel of uropathogenic bacterial isolates.** The MICs of apramycin, amikacin, gentamicin, and tobramycin in comparison to piperacillin/tazobactam, cefotaxime, and meropenem for 57 drug-resistant uropathogenic isolates were determined by broth microdilution assays according to CLSI standard procedures. The vertical dashed line indicate the EUCAST breakpoints 2021 for Enterobacteriales (grey) and *Pseudomonas* spp. (black), respectively. In the case of apramycin, the vertical dashed lines indicate the ECOFF values of 16 and 32 µg/mL, respectively.

**In-vivo efficacy studies**

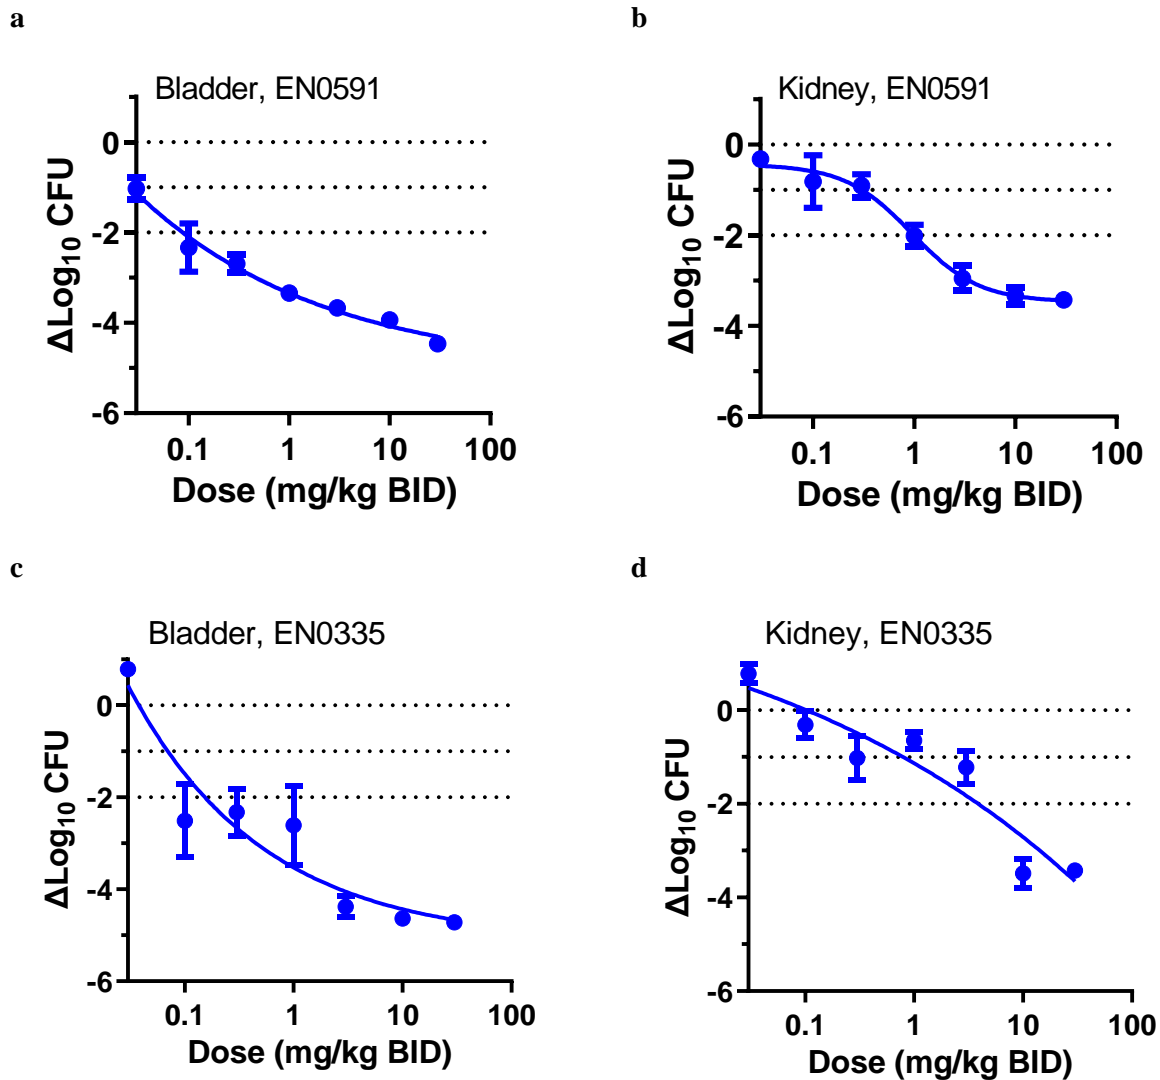

**Fig. S2 In-vivo efficacy of EBL-1003 in murine infection models with uropathogenic *E. coli* isolates.** (a-b) CFU count reduction in bladder and kidney of C3H/HeJ mice indicate EBL-1003 efficacy against the pan-aminoglycoside resistant *E. coli rmtB* isolate EN0591 (apramycin MIC of 4 mg/L). Doses of 0.1 and 1 mg/kg and higher significantly reduced mean bacterial load in bladder and kidneys, respectively (study 165-17-05-07; data plotted as mean  $\pm$  SD,  $n = 8$  mice per dose group; ANOVA, Dunnett's multiple comparison test,  $P \leq 0.0001$  vs. vehicle controls). (c-d) CFU count reduction in kidney and bladder indicate EBL-1003 efficacy against an *E. coli* isolate EN0335 (elevated apramycin MIC of 8 mg/kg). Doses as low as 0.1 and 0.3 mg/kg significantly reduced mean bacterial load in bladder and kidneys, respectively (study 165-17-05-11; data plotted as mean  $\pm$  SD,  $n = 5$  mice per dose group; ANOVA, Dunnett's multiple comparison test,  $P = 0.03$  and  $0.01$ , respectively, vs. vehicle controls).



a

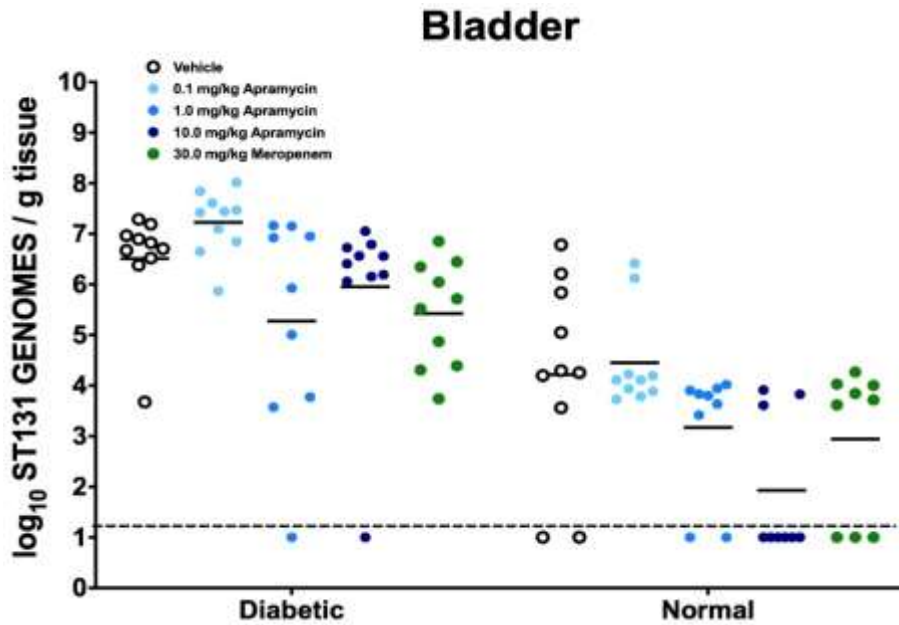

b

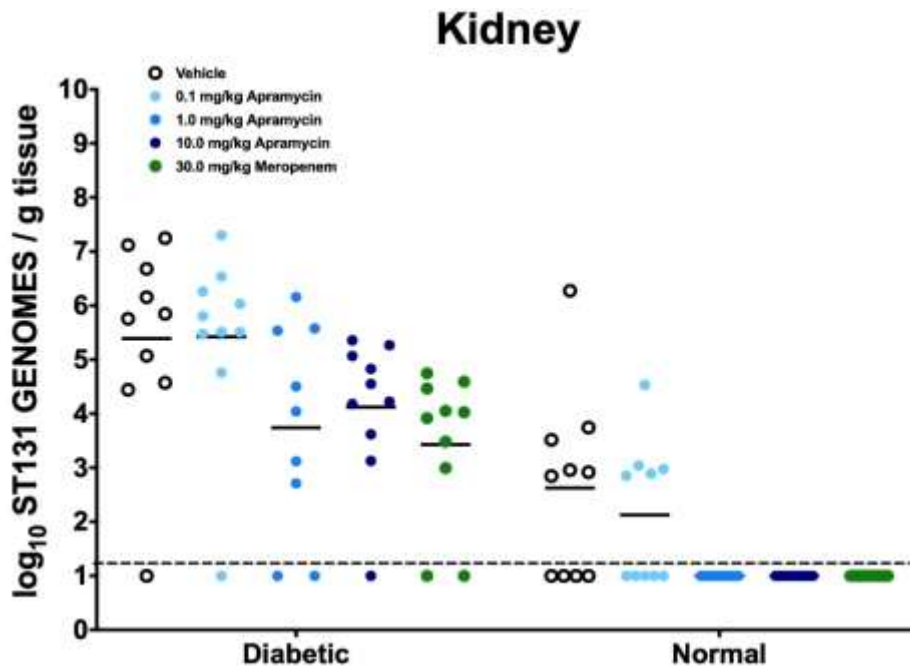

**Fig. S3 *In-vivo* potency of apramycin in diabetic murine infection model with the multidrug resistant *E. coli* M072 isolate.** Subcutaneous injection of 0.1, 1 and 10 mg/kg BID of EBL-1003 (apramycin) or 30 mg/kg of meropenem BID for three days in streptozotocin-induced diabetic or non-diabetic C3H/HeN mice at 4-5 weeks of age after infection with the uropathogenic, multidrug-resistant ESBL *E. coli* ST131 H30Rx strain MVA072 (M072). The bacterial burden in (a) bladder and (b) kidney after three days of treatment was assessed by RT-qPCR specific for ST131 genomes (study A02-4).

**Table S5: MIC determination for *E. coli* J96 at pH5 and pH7.4 in urine**

|              | MIC (mg/L) in urine |       |        |
|--------------|---------------------|-------|--------|
|              | EBL-1003            | GEN   | AMI    |
| <b>pH7.4</b> | 4                   | 1-2   | 2-4    |
| <b>pH5.0</b> | 64-128              | 32-64 | 64-128 |

**Table S6: pK<sub>a</sub> values by <sup>15</sup>N NMR spectroscopy and protonation of individual amino groups**

|                       | N-1  | N-3  | N-2' | N-6' | N-7' | N-3'' | N-4'' | N-4''' | Net charge | Reference |
|-----------------------|------|------|------|------|------|-------|-------|--------|------------|-----------|
| <b>Apramycin</b>      |      |      |      |      |      |       |       |        |            |           |
| pK <sub>a</sub>       | 8.2  | 6.6  | 7.7  | --   | 7.5  | --    | 6.7   | --     |            | (5)       |
| pK <sub>a</sub>       | 8.1  | 6.6  | 7.6  | --   | 7.4  | --    | 6.6   | --     |            | (6)       |
| <b>HA<sup>+</sup></b> |      |      |      |      |      |       |       |        |            |           |
| pH7.4                 | 83%  | 14%  | 61%  | --   | 50%  | --    | 14%   | --     | +2.22      |           |
| pH6.5                 | 98%  | 56%  | 93%  | --   | 89%  | --    | 56%   | --     | +3.90      |           |
| pH6.0                 | 99%  | 80%  | 98%  | --   | 96%  | --    | 80%   | --     | +4.53      |           |
| pH5.0                 | 100% | 98%  | 100% | --   | 100% | --    | 98%   | --     | +4.94      |           |
| <b>Gentamicin</b>     |      |      |      |      |      |       |       |        |            |           |
| pK <sub>a</sub>       | 8.9  | 7.2  | 8.2  | 10.0 | --   | 9.3   | --    | --     |            | (7)       |
| <b>HA<sup>+</sup></b> |      |      |      |      |      |       |       |        |            |           |
| pH7.4                 | 97%  | 39%  | 86%  | 100% | --   | 99%   | --    | --     | +4.20      |           |
| pH6.5                 | 100% | 83%  | 98%  | 100% | --   | 100%  | --    | --     | +4.81      |           |
| pH6.0                 | 100% | 94%  | 99%  | 100% | --   | 100%  | --    | --     | +4.93      |           |
| pH5.0                 | 100% | 99%  | 100% | 100% | --   | 100%  | --    | --     | +4.99      |           |
| <b>Amikacin</b>       |      |      |      |      |      |       |       |        |            |           |
| pK <sub>a</sub>       | >10  | 7.6  | --   | 8.9  | --   | 8.1   | --    | 9.7    |            | (8)       |
| pK <sub>a</sub>       | >10  | 7.6  | --   | 8.8  | --   | 8.1   | --    | 9.9    |            | (9)       |
| <b>HA<sup>+</sup></b> |      |      |      |      |      |       |       |        |            |           |
| pH7.4                 | 100% | 61%  | --   | 96%  | --   | 83%   | --    | 100%   | +4.41      |           |
| pH6.5                 | 100% | 93%  | --   | 100% | --   | 98%   | --    | 100%   | +4.90      |           |
| pH6.0                 | 100% | 98%  | --   | 100% | --   | 99%   | --    | 100%   | +4.97      |           |
| pH5.0                 | 100% | 100% | --   | 100% | --   | 100%  | --    | 100%   | +5.00      |           |

(5) Dorman DE, Paschal JW, and Merkel KE (1976) *J. Am. Chem. Soc.* 98:6885-6888. DOI: 10.1021/ja00438a020

(6) Paschal JW and Dorman DE (1978) *Organic Magnetic Resonance*. 11:632-634. DOI: 10.1002/mrc.1270111210

(7) Lesniak W, Mc Laren J, Harris WR, Pecoraro VL, and Schacht J. (2003) *Carbohydr Res.* 338:2853-62. DOI: 10.1016/j.carres.2003.08.005

(8) Cox JR and Serspersu EH (1997) *Biochemistry* 36:2353-2359. DOI: 10.1021/bi9626822

(9) Alkhzem AH, Woodman TJ, and Blagbrough IS (2020) *ACS Omega* 5:21094-21103. DOI: 10.1021/acsomega.0c02744

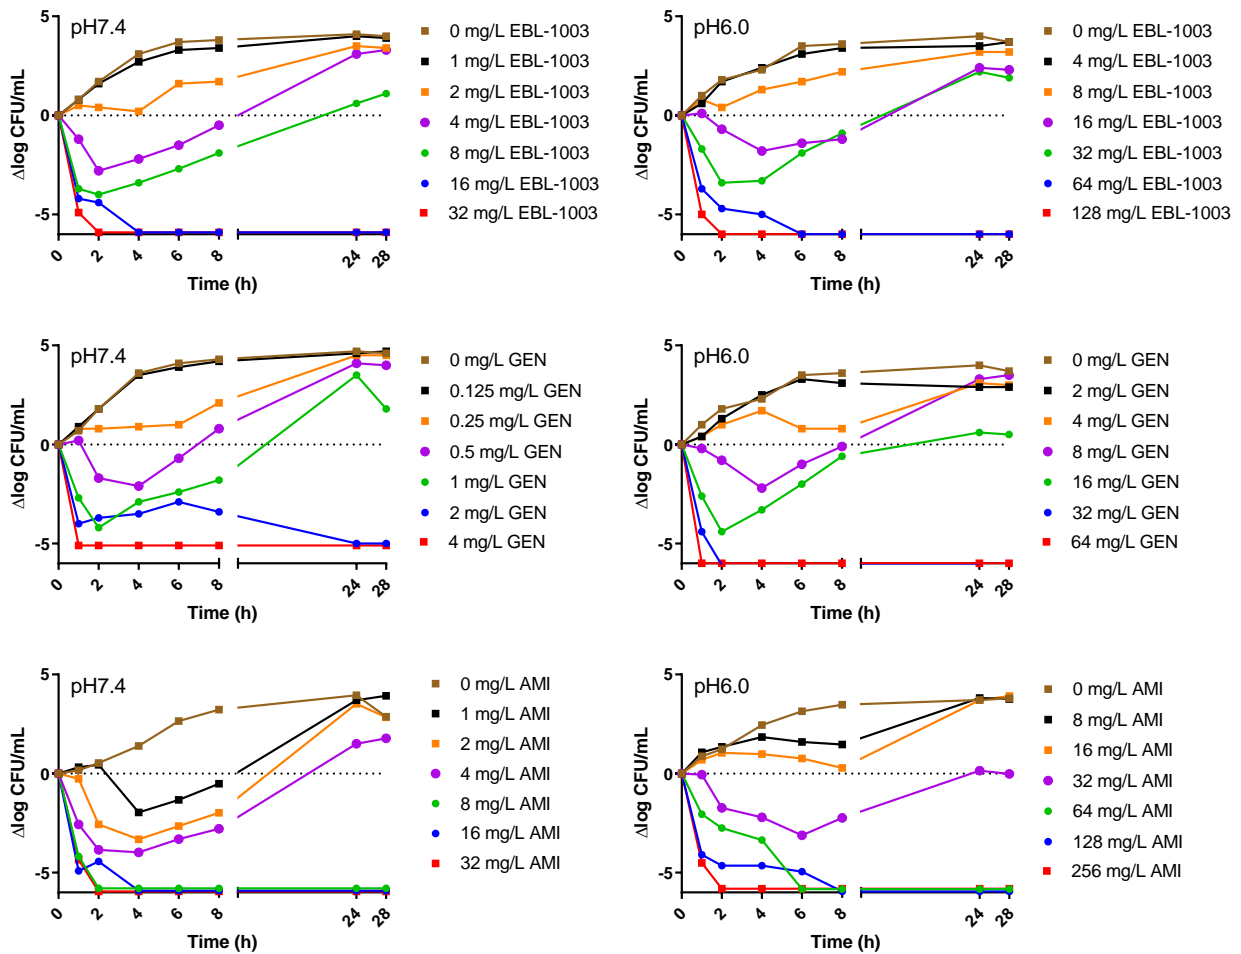

**Fig. S4 Time-kill analysis of EBL-1003 (apramycin), in comparison to gentamicin (GEN) and amikacin (AMI) with *E. coli* strain J96 at neutral and acidic pH.**

## Pharmacokinetics and nephrotoxicity

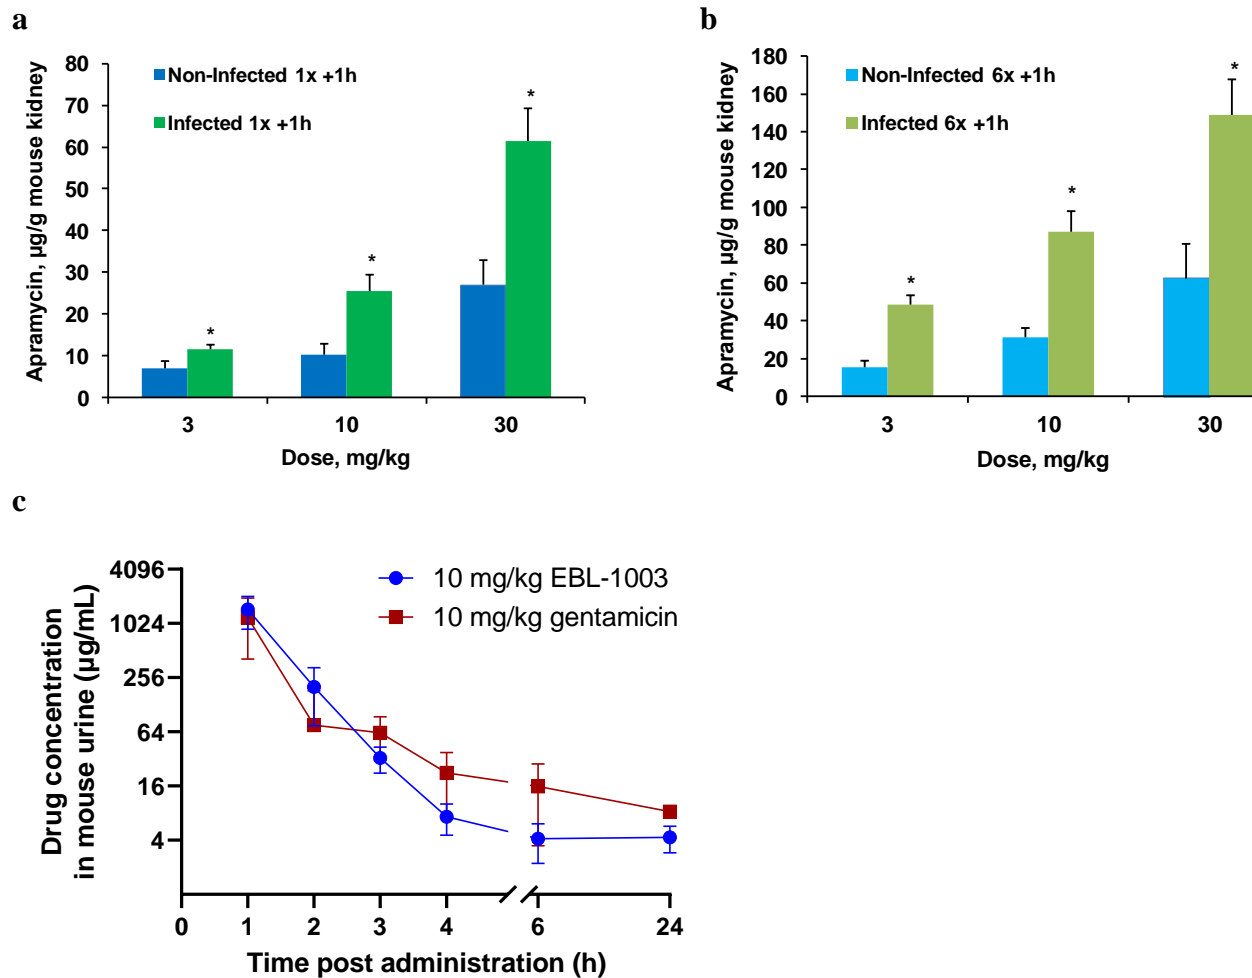

**Fig. S5 Apramycin exposure in non-infected and infected murine kidney tissue and in urine after subcutaneous administration of EBL-1003.** (a) Apramycin concentration in kidneys one hour after a single dose of EBL-1003 in healthy and infected mice. Healthy NMRI mice (study EXP-18-BN9099) and C3H/HeJ mice infected by intraurethral inoculation of  $5 \times 10^7$  CFU of *E. coli* isolate EN591 one day prior to start of treatment (study 165-17-05-07 and EXP-18-BN9096) were treated subcutaneously with 3, 10, or 30 mg/kg BID of EBL-1003 (data plotted as mean $\pm$ SD of  $n = 4$  healthy animals or  $n = 8$  infected animals per dose group). (b) Apramycin concentration in the kidneys of healthy and infected animals after three days of repeated BID dosing (total of six doses). Kidneys were harvested one hour after administration of the final dose. Apramycin concentrations in the kidneys of infected mice were compared to those in non-infected mice using Student's t-tests.  $P < 0.05$  was considered statistically significant (\*). (c) Apramycin concentration in mouse urine in comparison to gentamicin after a single subcutaneous dose of 10 mg/kg (data plotted as mean of  $n = 4$  animals per time point; study EXP-17-BN9069).

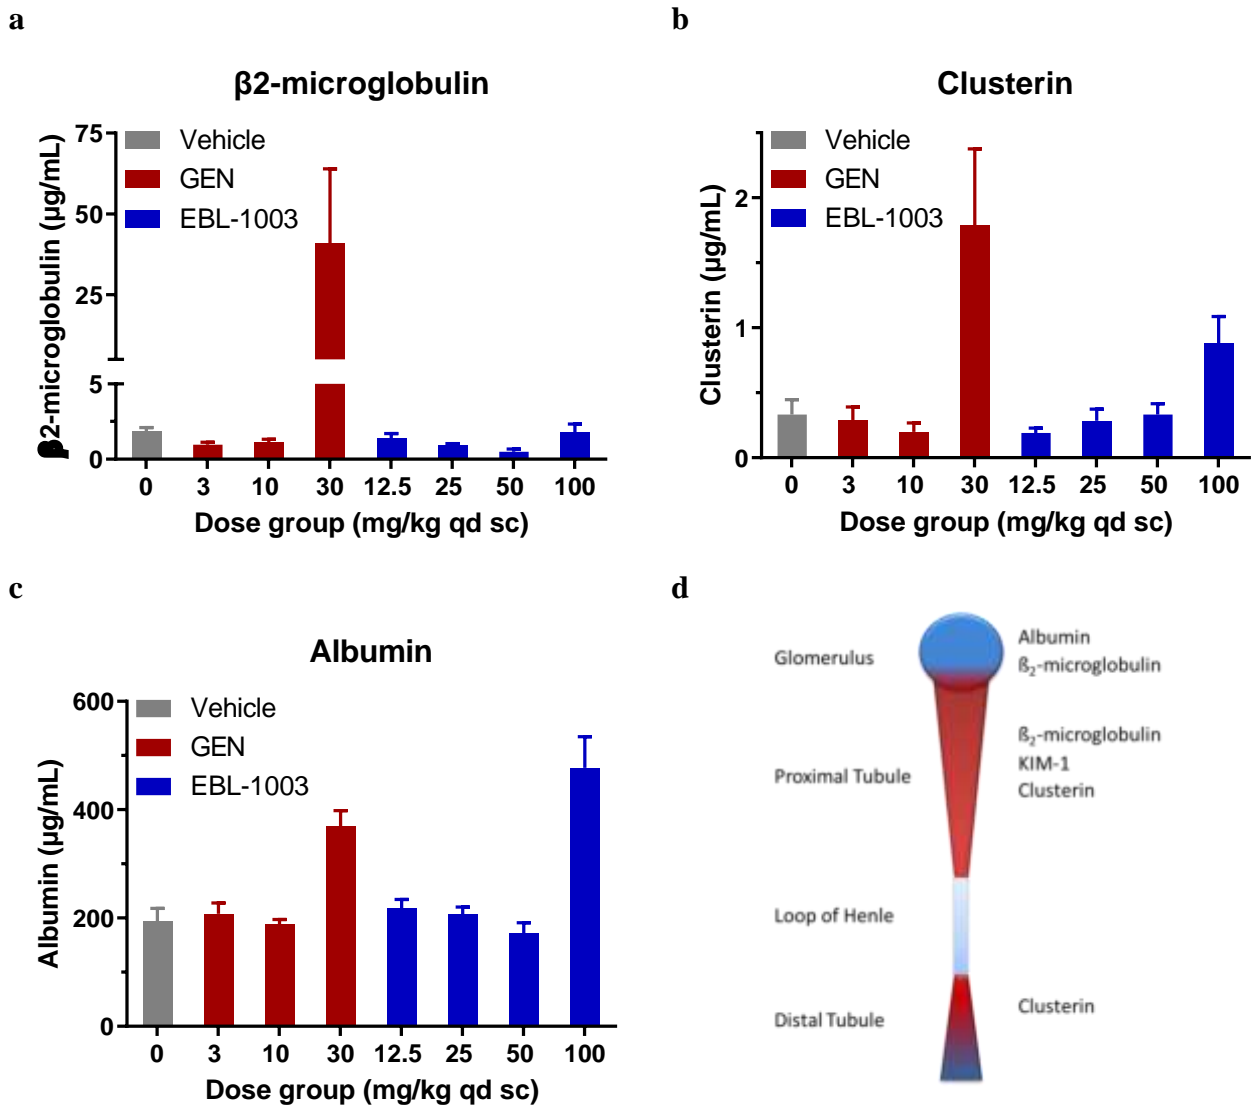

**Fig. S6 Quantification of nephrotoxic biomarkers in adult rats treated with gentamicin or apramycin.** (a)  $\beta_2$ -microglobulin concentration in the urine of adult Sprague-Dawley rats ( $\geq 14$  weeks old at first dose) after 14 days of once-daily subcutaneous treatment with gentamicin (GEN) or apramycin (EBL-1003), respectively. (b) Clusterin, and (c) albumin concentrations in the same urine samples. All values are plotted as mean  $\pm$  SEM ( $n = 5$  animals per dose group; study EXP-17-BM8077). (d) Renal schematic indicating the likely site of cellular damage based on the biomarker profile. Aminoglycoside toxicity is known for primarily targeting the proximal tubular cells.

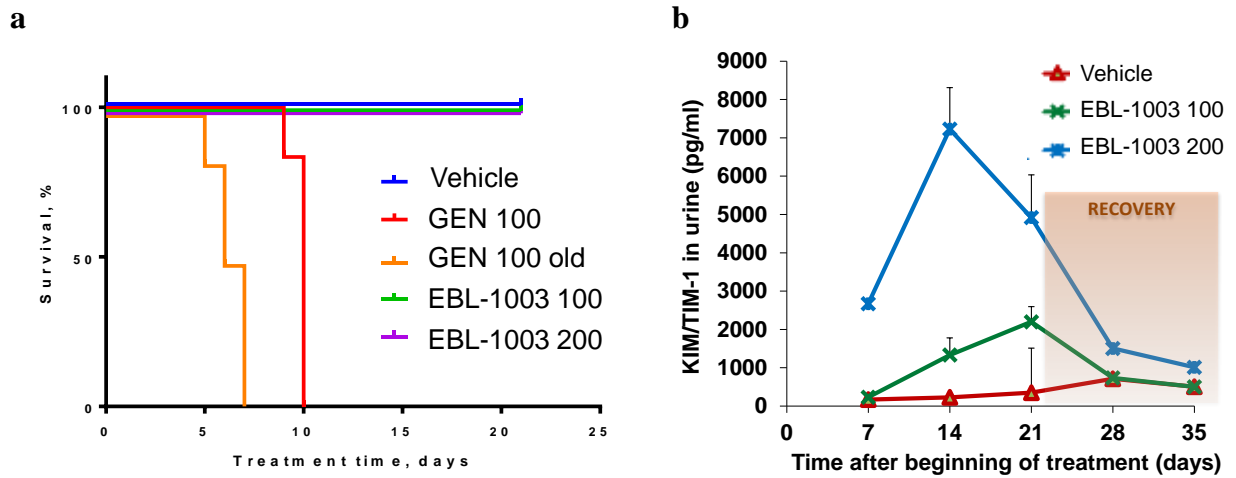

**Fig. S7 Survival and recovery of rats dosed with 100 and 200 mg/kg of apramycin (EBL-1003) or gentamicin (GEN) for up to 21 days.** (a) Survival curves of rats treated with 100 mg/kg q.d. of gentamicin (GEN), 100 or 200 mg/kg q.d. of apramycin (EBL-1003), or vehicle control (physiologic saline) for 21 days ( $n = 5$  animals per dose group). For the gentamicin dosing group, we included a control group that was 18 weeks old at start of treatment (GEN 100 old) to determine a possible effect of age on nephrotoxic vulnerability (study EXP-17-BM8056). (b) Renal recovery of rats after 21 days of treatment with 100 or 200 mg/kg of EBL-1003 was monitored for another two weeks after the last dose (35 days after start of treatment; study EXP-17-BM8056).

## Supplementary References

1. Wijting IEA, Alisma J, Melles DC, Schipper EM, Schuit SCE. Urinary tract infections in a university hospital: pathogens and antibiotic susceptibility. *Neth J Med*. 2019;77(6):210-9.
2. Stefaniuk E, Suchocka U, Bosacka K, Hryniewicz W. Etiology and antibiotic susceptibility of bacterial pathogens responsible for community-acquired urinary tract infections in Poland. *Eur J Clin Microbiol Infect Dis*. 2016;35(8):1363-9.
3. Plate A, Kronenberg A, Risch M, Mueller Y, Di Gangi S, Rosemann T, et al. Active surveillance of antibiotic resistance patterns in urinary tract infections in primary care in Switzerland. *Infection*. 2019;47(6):1027-35.
4. Koningstein M, van der Bij AK, de Kraker ME, Monen JC, Muilwijk J, de Greeff SC, et al. Recommendations for the empirical treatment of complicated urinary tract infections using surveillance data on antimicrobial resistance in the Netherlands. *PLoS One*. 2014;9(1):e86634.
5. Dorman DE, Paschal JW, Merkel KE.  $^{15}\text{N}$  nuclear magnetic resonance spectroscopy. The nebramycin aminoglycosides. *J Am Chem Soc*. 1976;98(22):6885-8.
6. Paschal JW, Dorman DE. Determination of pKa values using  $^{15}\text{N}$  and  $^{13}\text{C}$  nuclear magnetic resonance spectroscopy. The case of apramycin. *Organic Magnetic Resonance*. 1978;11(12):632-4.
7. Lesniak W, Mc Laren J, Harris WR, Pecoraro VL, Schacht J. An isocratic separation of underivatized gentamicin components,  $^1\text{H}$  NMR assignment and protonation pattern. *Carbohydr Res*. 2003;338(24):2853-62.
8. Cox JR, Serpersu EH. Biologically important conformations of aminoglycoside antibiotics bound to an aminoglycoside 3'-phosphotransferase as determined by transferred nuclear Overhauser effect spectroscopy. *Biochemistry*. 1997;36(9):2353-9.
9. Alkhzem AH, Woodman TJ, Blagbrough IS. Individual pK a Values of Tobramycin, Kanamycin B, Amikacin, Sisomicin, and Netilmicin Determined by Multinuclear NMR Spectroscopy. *ACS Omega*. 2020;5(33):21094-103.
